# Supplementary material for: Human Pavlovian fear conditioning conforms to probabilistic learning
Source: PubMed Central journal article supplement (PMC6118355; doi:10.1371/journal.pcbi.1006243), 2018-08-31
Supplement: pcbi.1006243.s001.pdf [file pcbi.1006243.s001.pdf]

A. Probabilistic models

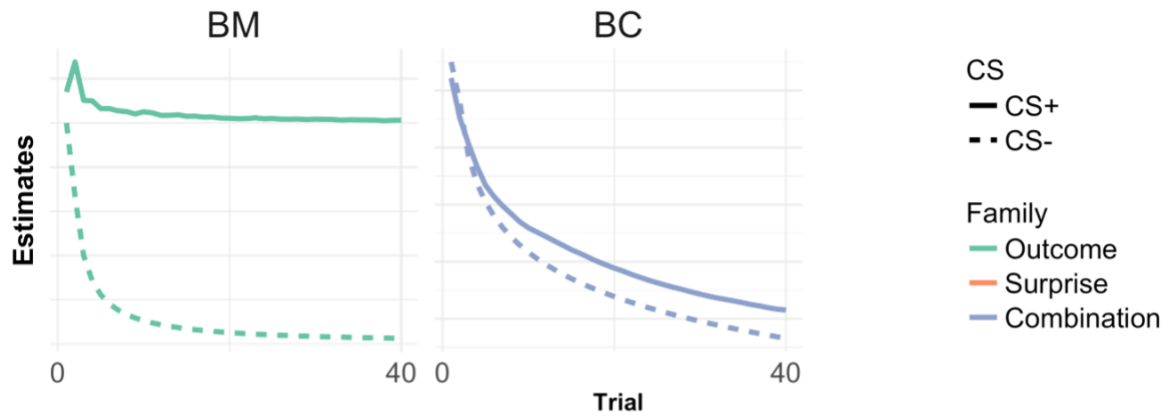

B. Non probabilistic models

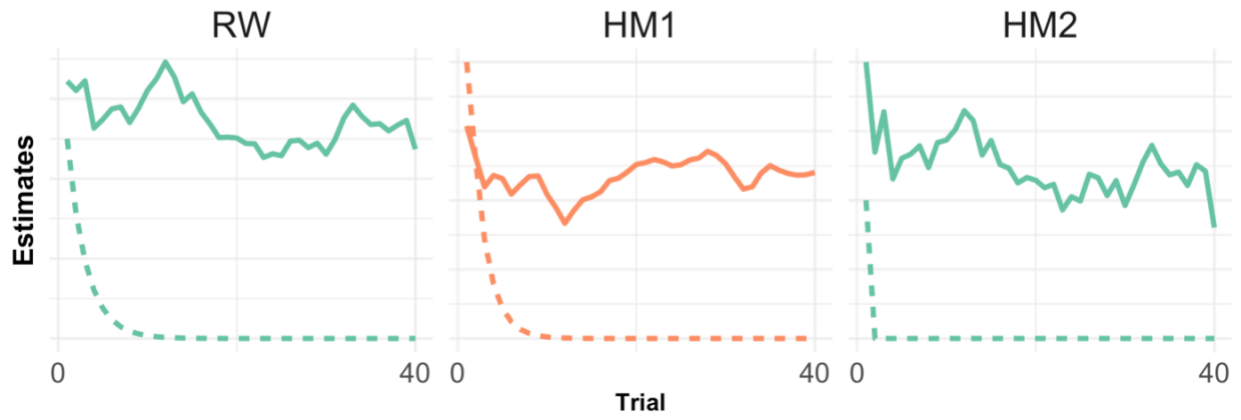

Supplemental Fig 1. Mean model estimates, over 100 simulated CS+/- and reinforcement sequences.
