# Supplementary material for: Human Pavlovian fear conditioning conforms to probabilistic learning
Source: PubMed Central journal article supplement (PMC6118355; doi:10.1371/journal.pcbi.1006243), 2018-08-31
Supplement: pcbi.1006243.s002.pdf [file pcbi.1006243.s002.pdf]

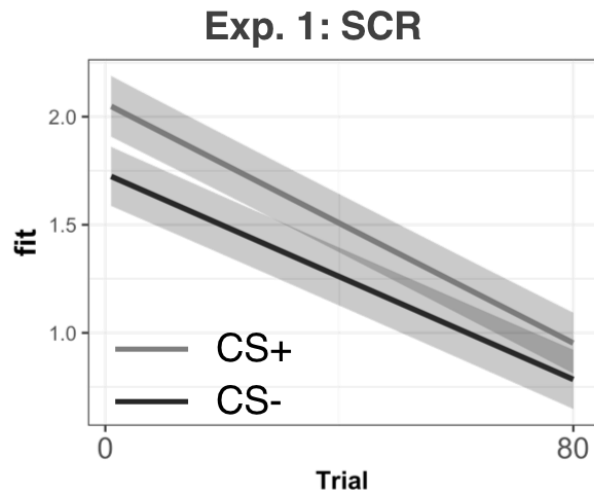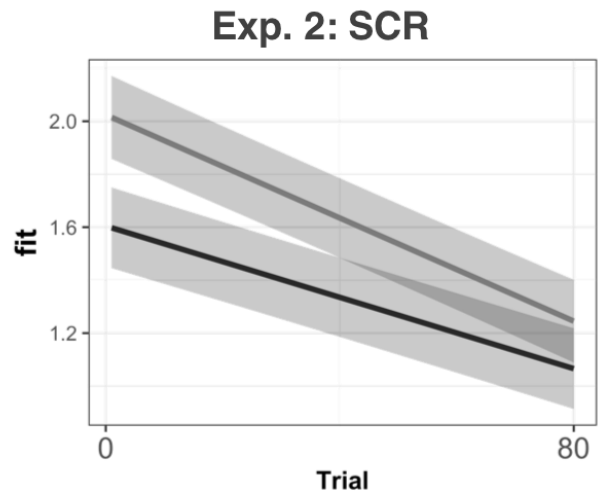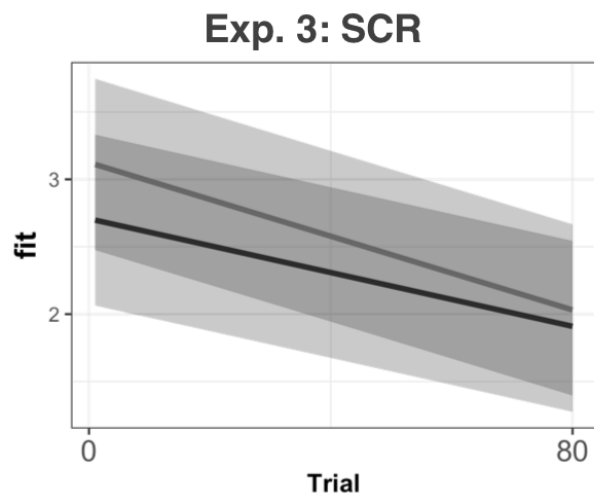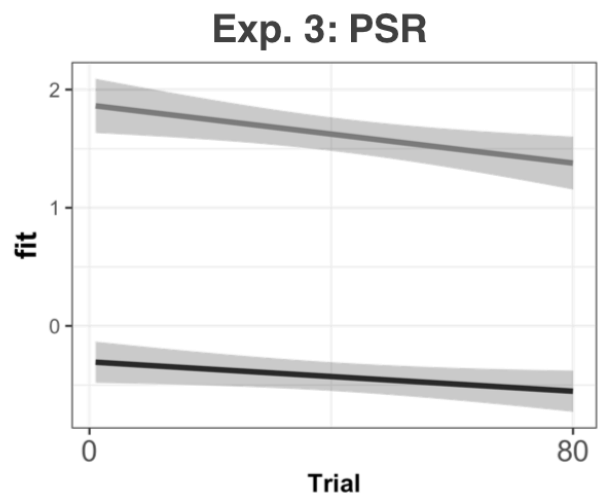

Supplemental Fig 2. Results of LME fitting for SCR and PSR for three experiments, for CS+ / CS- trials. The plotted lines illustrate the fitted slopes across participants.
